# Supplementary material for: Palmitic Acid Promotes Lung Metastasis of Melanomas via the TLR4/TRIF-Peli1-pNF-κB Pathway
Source: MDPI journal article supplement (doi:10.3390/metabo12111132), 2022-11-17
Supplement: s1 [file s1]

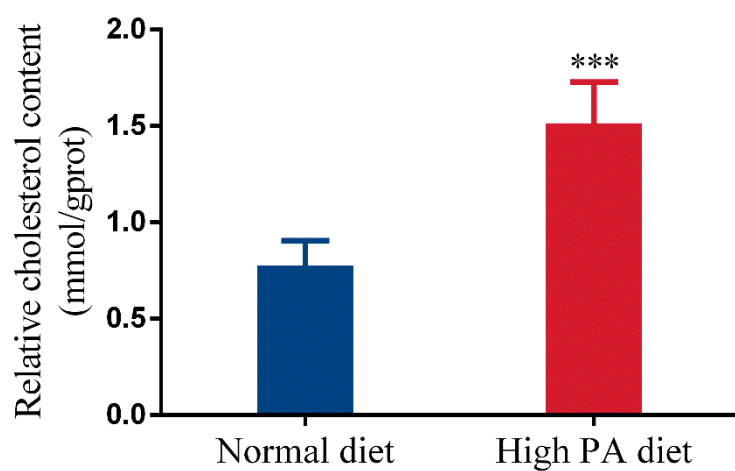

**Figure S1.** Serum cholesterol level

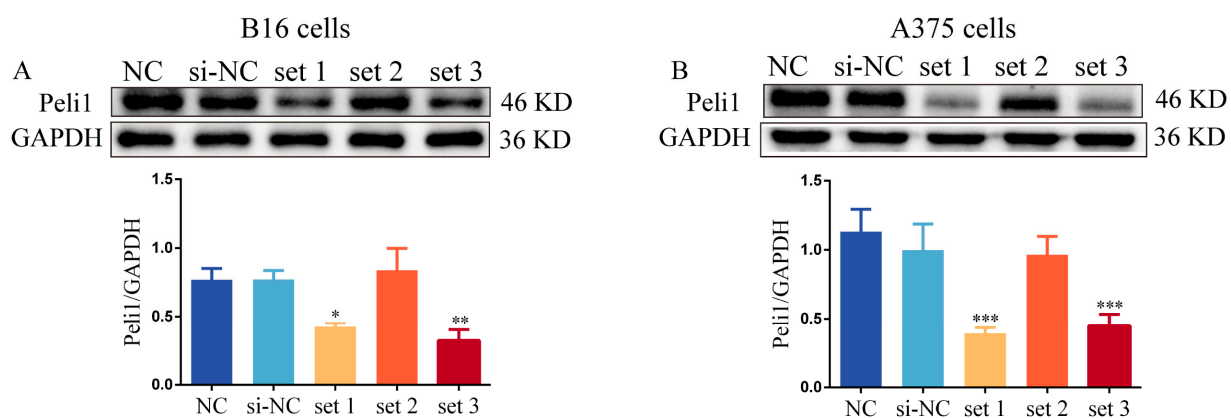

**Figure S2.** Interference efficiency of siRNA

(A) Interference efficiency of siRNA in B16. (B) Interference efficiency of siRNA in A375
